# Supplementary material for: How do primary healthcare workers in low-income and middle-income countries obtain information during consultations to aid safe prescribing? A systematic review protocol
Source: PubMed Central journal article supplement — BMJ Open. 2019 Jan 24;9(1):e023015. doi: 10.1136/bmjopen-2018-023015 (PMC6347871; doi:10.1136/bmjopen-2018-023015), 2019-01-24
Supplement: bmjopen-2018-023015.reviewer_comments.pdf [file bmjopen-2018-023015.reviewer_comments.pdf]

## PEER REVIEW HISTORY

BMJ Open publishes all reviews undertaken for accepted manuscripts. Reviewers are asked to complete a checklist review form (<http://bmjopen.bmj.com/site/about/resources/checklist.pdf>) and are provided with free text boxes to elaborate on their assessment. These free text comments are reproduced below.

### ARTICLE DETAILS

|                            |                                                                                                                                                                   |
|----------------------------|-------------------------------------------------------------------------------------------------------------------------------------------------------------------|
| <b>TITLE (PROVISIONAL)</b> | How do primary healthcare workers in low- and middle-income countries obtain information during consultations to aid safe prescribing: systematic review protocol |
| <b>AUTHORS</b>             | Smith, Chris; Van Velthoven, Michelle; Pakenham-Walsh, Neil                                                                                                       |

### VERSION 1 – REVIEW

|                        |                                                                                      |
|------------------------|--------------------------------------------------------------------------------------|
| <b>REVIEWER</b>        | Manish Kumar<br>MEASURE Evaluation, University of North Carolina at Chapel Hill, USA |
| <b>REVIEW RETURNED</b> | 17-Apr-2018                                                                          |

|                         |                                                                                                                                                                                                                                                                                                                                                                                  |
|-------------------------|----------------------------------------------------------------------------------------------------------------------------------------------------------------------------------------------------------------------------------------------------------------------------------------------------------------------------------------------------------------------------------|
| <b>GENERAL COMMENTS</b> | The paper suggests a strong systematic review protocol to study health information access issues in primary care setting of LMICs. The objective, methodology and expected outcomes are clearly articulated. However, study limitations are not clearly defined under the appropriate heading. It is mentioned under ethics and dissemination. It will be good to reorganize it. |
|-------------------------|----------------------------------------------------------------------------------------------------------------------------------------------------------------------------------------------------------------------------------------------------------------------------------------------------------------------------------------------------------------------------------|

|                        |                                                                                    |
|------------------------|------------------------------------------------------------------------------------|
| <b>REVIEWER</b>        | Muhammad Rehan Sarwar<br>Akhtar Saeed College of Pharmaceutical Sciences, Pakistan |
| <b>REVIEW RETURNED</b> | 27-Jul-2018                                                                        |

|                         |                                                                              |
|-------------------------|------------------------------------------------------------------------------|
| <b>GENERAL COMMENTS</b> | The article is well written and extremely incisive for the contents treated. |
|-------------------------|------------------------------------------------------------------------------|

|                        |                                                 |
|------------------------|-------------------------------------------------|
| <b>REVIEWER</b>        | Claire Anderson<br>University of Nottingham, UK |
| <b>REVIEW RETURNED</b> | 14-Aug-2018                                     |

|                         |                                                                                          |
|-------------------------|------------------------------------------------------------------------------------------|
| <b>GENERAL COMMENTS</b> | This is a well written and clear protocol and will be a really useful systematic review. |
|-------------------------|------------------------------------------------------------------------------------------|

### VERSION 1 – AUTHOR RESPONSE

| Comments                                                                                                                                                                                                                                                                                                                                                      | Response                                                                                                                                                                                                                |
|---------------------------------------------------------------------------------------------------------------------------------------------------------------------------------------------------------------------------------------------------------------------------------------------------------------------------------------------------------------|-------------------------------------------------------------------------------------------------------------------------------------------------------------------------------------------------------------------------|
| Reviewer 1: The paper suggests a strong systematic review protocol to study health information access issues in primary care setting of LMICs. The objective, methodology and expected outcomes are clearly articulated. However, study limitations are not clearly defined under the appropriate heading. It is mentioned under ethics and dissemination. It | We would like to thank the editor and reviewers for reviewing our paper and for their feedback.<br><br>We have addressed this by adding limitations under the strengths and limitations section following the abstract. |

|                                                                                                      |                                             |
|------------------------------------------------------------------------------------------------------|---------------------------------------------|
| will be good to reorganize it.                                                                       |                                             |
| Reviewer 2: The article is well written and extremely incisive for the contents treated.             | Thank you very much.                        |
| Reviewer 3: This is a well written and clear protocol and will be a really useful systematic review. | Many thanks, we hope it will be useful too. |
