# Supplementary material for: How do primary healthcare workers in low-income and middle-income countries obtain information during consultations to aid safe prescribing? A systematic review protocol
Source: PubMed Central journal article supplement — BMJ Open. 2019 Jan 24;9(1):e023015. doi: 10.1136/bmjopen-2018-023015 (PMC6347871; doi:10.1136/bmjopen-2018-023015), 2019-01-24
Supplement: bmjopen-2018-023015supp002.pdf [file bmjopen-2018-023015supp002.pdf]

## Supplementary File 2

### Searches

#### 1. Ovid MEDLINE(R) In-Process & Other Non-Indexed Citations, Ovid MEDLINE(R) Daily and Ovid MEDLINE(R) <1946 to Present> Searched 1<sup>st</sup> December 2017

- 1 exp Health Personnel/ (470086)
- 2 (((health or medical or healthcare) adj (personnel or worker\* or auxiliar\* or staff or professional\*)) or doctor\* or physician\* or GP or general practitioner? or family doctor or nurse\* or midwi\* or clinical officer\* or pharmacist\* or dentist\* or ((birth or childbirth or labor or labour) adj (attendant? or assistant?))).ti,ab,kw. (903556)
- 3 (lay adj5 (worker? or visitor? or attendant? or aide or aides or support\$ or person\$ or helper? or carer? or caregiver? or care giver? or consultant? or assistant? or staff)).ti,ab,kw. (2050)
- 4 (paraprofessional? or paramedic or paramedics or paramedical worker? or paramedical personnel or allied health personnel or allied health worker? or support worker? or home health aide?).ti,ab,kw. (7866)
- 5 ((community or village?) adj3 (health worker? or health care worker? or healthcare worker?)).ti,ab,kw. (4384)
- 6 (doula? or douladural? or monitrice\* or "barefoot doctor?").ti,ab,kw. (432)
- 7 Primary Health Care/ or (primary adj (health or care)).ti,ab,kw. (139360)
- 8 or/1-7 (1239133)
- 9 (decision\* adj3 (make or makes or making or made or support\* or algorithm\* or aid or aids or app or apps or application\* or tool\* or instrument\* or technolog\* or technique\* or system\* or program\* or process\* or method\* or intervention\* or material\* or board\* or guide\* or counselling\*)).ti,ab,kw. (168674)
- 10 Decision Making/ (87993)
- 11 Decision Support Systems, Clinical/ (7147)
- 12 Decision Support Techniques/ (18896)
- 13 Diagnosis, Computer-assisted/ (22858)
- 14 Expert Systems/ (3530)
- 15 Point-of-Care Systems/ (10987)
- 16 Guideline Adherence/ or Clinical Protocols/ or Checklist/ (60686)
- 17 Therapy, Computer-Assisted/ (6753)
- 18 "Drug Therapy, Computer-Assisted"/ (1731)
- 19 Electronic Prescribing/ (893)
- 20 Clinical Laboratory Information Systems/ or Clinical Pharmacy Information Systems/ (3270)
- 21 (((guideline\* or protocol\*) adj4 (adher\* or comply or complian\* or observ\*)) or checklist\*).ti,ab,kw. (49650)
- 22 Drug Utilization/ (20253)
- 23 drug prescriptions/ or inappropriate prescribing/ or medication errors/ (39442)
- 24 Pharmacy/ or Pharmacies/ or Education, Pharmacy/ (21040)
- 25 practice patterns, nurses'/ or practice patterns, physicians'/ (57488)
- 26 (prescrib\* or prescription\* or dispens\* or pharmac\*).ti,ab,kw. (880900)
- 27 ((prescrib\* or prescription\* or dispens\* or pharmac\*) adj3 (pattern\* or habit\* or behavi\* or practice\* or practise\* or custom\*)).ti,ab,kw. (27761)
- 28 Access to Information/ (5939)
- 29 Health Information Systems/ut [Utilization] (107)
- 30 exp Information Services/ut [Utilization] (1467)
- 31 Information Seeking Behavior/ (1687)
- 32 Computer Literacy/ or Information Literacy/ (1849)
- 33 Knowledge/ (10411)
- 34 Health Knowledge, Attitudes, Practice/ (100228)
- 35 (information or knowledge).ti,ab,kw. (1559658)

36 ((information or knowledge) adj3 (access\* or seek\* or search\* or request\*).ti,ab,kw.  
(22942)  
37 or/9-36 (2731874)  
38 Developing Countries.sh,kf. (85222)  
39 Africa/ or Asia/ or Caribbean/ or West Indies/ or Middle East/ or South America/ or Latin  
America/ or Central America/ (78370)  
40 (Africa or Asia or Caribbean or West Indies or Middle East or South America or Latin  
America or Central America).tw. (170009)  
41 ((Afghanistan or Albania or Algeria or Angola or Argentina or Armenia or Armenian or  
Azerbaijan or Bangladesh or Benin or Byelarus or Byelorussian or Belarus or Belorussian or  
Belorussia or Belize or Bhutan or Bolivia or Bosnia or Herzegovina or Hercegovina or Botswana  
or Brazil or Bulgaria or Burkina Faso or Burkina Fasso or Upper Volta or Burundi or Urundi or  
Cambodia or Khmer Republic or Kampuchea or Cameroon or Camerouns or Cameron or  
Camerons or Cape Verde or Central African Republic or Chad or China or Colombia or Comoros  
or Comoro Islands or Comores or Mayotte or Congo or Zaire or Costa Rica or Cote d'Ivoire or  
Ivory Coast or Cuba or Djibouti or French Somaliland or Dominica or Dominican Republic or East  
Timor or East Timor or East Timor Leste or Ecuador or Egypt or United Arab Republic or El Salvador  
or Eritrea or Ethiopia or Fiji or Gabon or Gabonese Republic or Gambia or Gaza or Georgia  
Republic or Georgian Republic or Ghana or Grenada or Guatemala or Guinea or Guiana or  
Guyana or Haiti or Honduras or India or Maldives or Indonesia or Iran or Iraq or Jamaica or  
Jordan or Kazakhstan or Kazakh or Kenya or Kiribati or Korea or Kosovo or Kyrgyzstan or  
Kirghizia or Kyrgyz Republic or Kirghiz or Kirgizstan or Lao PDR or Laos or Lebanon or Lesotho  
or Basutoland or Liberia or Libya or Macedonia or Madagascar or Malagasy Republic or Malaysia  
or Malaya or Malay or Sabah or Sarawak or Malawi or Mali or Marshall Islands or Mauritania or  
Mauritius or Agalega Islands or Mexico or Micronesia or Middle East or Moldova or Moldovia or  
Moldovian or Mongolia or Montenegro or Morocco or Ifni or Mozambique or Myanmar or Myanma  
or Burma or Namibia or Nepal or Netherlands Antilles or Nicaragua or Niger or Nigeria or Muscat  
or Pakistan or Palau or Palestine or Panama or Paraguay or Peru or Philippines or Philipines or  
Phillipines or Phillipines or Papua New Guinea or Romania or Rumania or Roumania or Rwanda  
or Ruanda or Saint Lucia or St Lucia or Saint Vincent or St Vincent or Grenadines or Samoa or  
Samoan Islands or Navigator Island or Navigator Islands or Sao Tome or Senegal or Serbia or  
Montenegro or Seychelles or Sierra Leone or Sri Lanka or Solomon Islands or Somalia or Sudan  
or Suriname or Surinam or Swaziland or South Africa or Syria or Tajikistan or Tadjikistan or  
Tadjikistan or Tadjik or Tanzania or Thailand or Togo or Togolese Republic or Tonga or Tunisia  
or Turkey or Turkmenistan or Turkmen or Uganda or Ukraine or Uzbekistan or Uzbek or Vanuatu  
or New Hebrides or Venezuela or Vietnam or Viet Nam or West Bank or Yemen or Zambia or  
Zimbabwe) not ("African-American\*" or "African American\*" or "Mexican American\*" or "American  
Indian\*" or "Asian American\*" or "native american\*")).tw. (911556)  
42 exp africa/ or algeria/ or egypt/ or libya/ or morocco/ or tunisia/ or cameroon/ or central  
african republic/ or chad/ or congo/ or "democratic republic of the congo"/ or equatorial guinea/ or  
gabon/ or burundi/ or djibouti/ or eritrea/ or ethiopia/ or kenya/ or rwanda/ or somalia/ or south  
sudan/ or sudan/ or tanzania/ or uganda/ or angola/ or botswana/ or lesotho/ or malawi/ or  
mozambique/ or namibia/ or south africa/ or swaziland/ or zambia/ or zimbabwe/ or benin/ or  
burkina faso/ or cape verde/ or cote d'ivoire/ or gambia/ or ghana/ or guinea/ or guinea-bissau/ or  
liberia/ or mali/ or mauritania/ or niger/ or nigeria/ or senegal/ or sierra leone/ or togo/ or americas/  
or exp caribbean region/ or exp west indies/ or exp central america/ or belize/ or costa rica/ or el  
salvador/ or guatemala/ or honduras/ or nicaragua/ or panama/ or panama canal zone/ or latin  
america/ or mexico/ or exp south america/ or argentina/ or bolivia/ or brazil/ or chile/ or colombia/  
or ecuador/ or french guiana/ or guyana/ or paraguay/ or peru/ or suriname/ or uruguay/ or  
venezuela/ or asia/ or asia, central/ or kazakhstan/ or kyrgyzstan/ or tajikistan/ or turkmenistan/ or  
uzbekistan/ or exp asia, southeastern/ or borneo/ or brunei/ or cambodia/ or timor-leste/ or  
indonesia/ or laos/ or malaysia/ or mekong valley/ or myanmar/ or philippines/ or singapore/ or  
thailand/ or vietnam/ or asia, western/ or bangladesh/ or bhutan/ or india/ or sikkim/ or middle  
east/ or afghanistan/ or bahrain/ or iran/ or iraq/ or israel/ or jordan/ or kuwait/ or lebanon/ or  
oman/ or qatar/ or saudi arabia/ or syria/ or turkey/ or united arab emirates/ or yemen/ or nepal/ or  
pakistan/ or sri lanka/ or far east/ or china/ or beijing/ or macau/ or tibet/ or korea/ or mongolia/ or

taiwan/ or indian ocean islands/ or comoros/ or madagascar/ or mauritius/ or reunion/ or seychelles/ or pacific islands/ or exp melanesia/ or exp micronesia/ or polynesia/ or pitcairn island/ or exp samoa/ or tonga/ or prince edward island/ or west indies/ or "antigua and barbuda"/ or bahamas/ or barbados/ or cuba/ or dominica/ or dominican republic/ or grenada/ or guadeloupe/ or haiti/ or jamaica/ or martinique/ or netherlands antilles/ or puerto rico/ or "saint kitts and nevis"/ or saint lucia/ or "saint vincent and the grenadines"/ or "trinidad and tobago"/ or united states virgin islands/ or oceania/ (1016763)

43 ((developing or less\* developed or under developed or underdeveloped or middle income or low\* income or underserved or under served or deprived or poor\*) adj (countr\* or nation? or population? or world or state\*)).ti,ab. (85470)

44 ((developing or less\* developed or under developed or underdeveloped or middle income or low\* income) adj (economy or economies)).ti,ab. (440)

45 (low\* adj (gdp or gnp or gross domestic or gross national)).tw. (219)

46 (low adj3 middle adj3 countr\*).tw. (9973)

47 (lmic or lmics or third world or lami countr\*).tw. (5479)

48 transitional countr\*.tw. (157)

49 or/38-48 (1508903)

50 8 and 37 and 49 (41601)

51 limit 50 to yr="2000 -Current" (34758)

**Medline +In-Process (Ovid) Update Search (1<sup>st</sup> Dec 2017-18<sup>th</sup> Jan 2018) – Searched 17<sup>th</sup> January 2018**

Result: 1051

**2. Cochrane Library – Searched 25<sup>th</sup> January 2018**

#1 MeSH descriptor: [Health Personnel] explode all trees 8110

#2 (((health or medical or healthcare) near/1 (personnel or worker\* or auxiliar\* or staff or professional\*)) or doctor\* or physician\* or GP or "general practitioner?" or "family doctor?" or nurse\* or midwi\* or "clinical officer\*" or pharmacist\* or dentist\* or ((birth or childbirth or labor or labour) near/1 (attendant? or assistant?))):ti,ab 49924

#3 (lay near/5 (worker? or visitor? or attendant? or aide or aides or support\* or person\* or helper? or carer? or caregiver? or care giver? or consultant? or assistant? or staff)):ti,ab 254

#4 (paraprofessional? or paramedic or paramedics or "paramedical worker?" or "paramedical personnel" or "allied health personnel" or "allied health worker?" or "support worker?" or "home health aide?"):ti,ab 639

#5 ((community or village?) near/3 ("health worker?" or "health care worker?" or "healthcare worker?")):ti,ab 484

#6 (doula? or douladural? or monitrice\* or "barefoot doctor?"):ti,ab 22

#7 (primary near/1 (health or care or healthcare)):ti,ab 13102

#8 MeSH descriptor: [Primary Health Care] this term only 4192

#9 {or #1-#8} 61779

#10 (decision\* near/3 (make or makes or making or made or support\* or algorithm\* or aid or aids or app or apps or application\* or tool\* or instrument\* or technolog\* or technique\* or system\* or program\* or process\* or method\* or intervention\* or material\* or board\* or guide\* or counselling\* or counseling)):ti,ab 9511

#11 MeSH descriptor: [Decision Making] this term only 2177

#12 MeSH descriptor: [Decision Support Systems, Clinical] this term only 390

#13 MeSH descriptor: [Decision Support Techniques] this term only 1847

#14 MeSH descriptor: [Diagnosis, Computer-Assisted] this term only 748

#15 MeSH descriptor: [Expert Systems] this term only 60

#16 MeSH descriptor: [Point-of-Care Systems] this term only 516

#17 [mh ^"Guideline Adherence"] or [mh ^"Clinical Protocols"] or [mh ^Checklist] 5091

#18 MeSH descriptor: [Therapy, Computer-Assisted] this term only 1173

#19 MeSH descriptor: [Drug Therapy, Computer-Assisted] this term only 163

#20 MeSH descriptor: [Electronic Prescribing] this term only 27

#21 [mh ^"Clinical Laboratory Information Systems"] or [mh ^"Clinical Pharmacy Information Systems"] 38

#22 (((guideline\* or protocol\*) near/4 (adher\* or comply or complian\* or observ\*)) or checklist\*);ti,ab 1112

#23 MeSH descriptor: [Drug Utilization] this term only 463

#24 [mh ^"drug prescriptions"] or [mh ^"inappropriate prescribing"] or [mh ^"medication errors"] 869

#25 [mh ^Pharmacy] or [mh ^Pharmacies] or [mh ^"Education, Pharmacy"] 180

#26 [mh ^"practice patterns, nurses"] or [mh ^"practice patterns, physicians"] 1446

#27 ((prescrib\* or prescription\* or dispens\* or pharmac\*) near/3 (pattern\* or habit\* or behavior\* or practice\* or practise\* or custom\*));ti,ab 2407

#28 MeSH descriptor: [Access to Information] this term only 49

#29 MeSH descriptor: [Health Information Systems] this term only 12

#30 [mh "Information Services"] 2103

#31 [mh ^"Information Seeking Behavior"] or [mh ^"Computer Literacy"] or [mh ^"Information Literacy"] or [mh ^"Knowledge"] or [mh ^"Health Knowledge, Attitudes, Practice"] 5514

#32 ((information or knowledge) near/3 (access\* or seek\* or search\* or request\*));ti,ab 1226

#33 {or #10-#32} 31735

#34 MeSH descriptor: [Developing Countries] this term only 1033

#35 [mh Africa] or [mh Asia] or [mh Caribbean] or [mh "West Indies"] or [mh "Middle East"] or [mh "South America"] or [mh "Latin America"] or [mh "Central America"] 25548

#36 ((Afghanistan or Albania or Algeria or Angola or Argentina or Armenia or Armenian or Azerbaijan or Bangladesh or Benin or Byelarus or Byelorussian or Belarus or Belorussian or Belorussia or Belize or Bhutan or Bolivia or Bosnia or Herzegovina or Hercegovina or Botswana or Brazil or Bulgaria or Burkina Faso or "Burkina Fasso" or "Upper Volta" or Burundi or Urundi or Cambodia or "Khmer Republic" or Kampuchea or Cameroon or Cameroons or Cameron or Camerons or "Cape Verde" or "Central African Republic" or Chad or China or Colombia or Comoros or "Comoro Islands" or Comores or Mayotte or Congo or Zaire or "Costa Rica" or "Cote d'Ivoire" or "Ivory Coast" or Cuba or Djibouti or "French Somaliland" or Dominica or "Dominican Republic" or "East Timor" or "East Timur" or "Timor Leste" or Ecuador or Egypt or "United Arab Republic" or "El Salvador" or Eritrea or Ethiopia or Fiji or Gabon or "Gabonese Republic" or Gambia or Gaza or "Georgia Republic" or "Georgian Republic" or Ghana or Grenada or Guatemala or Guinea or Guiana or Guyana or Haiti or Honduras or India or Maldives or Indonesia or Iran or Iraq or Jamaica or Jordan or Kazakhstan or Kazakh or Kenya or Kiribati or Korea or Kosovo or Kyrgyzstan or Kirghizia or "Kyrgyz Republic" or Kirghiz or Kirgizstan or "Lao PDR" or Laos or Lebanon or Lesotho or Basutoland or Liberia or Libya or Macedonia or Madagascar or "Malagasy Republic" or Malaysia or Malaya or Malay or Sabah or Sarawak or Malawi or Mali or "Marshall Islands" or Mauritania or Mauritius or "Agalega Islands" or Mexico or Micronesia or "Middle East" or Moldova or Moldovia or Moldovian or Mongolia or Montenegro or Morocco or Ifni or Mozambique or Myanmar or Myanma or Burma or Namibia or Nepal or "Netherlands Antilles" or Nicaragua or Niger or Nigeria or Muscat or Pakistan or Palau or Palestine or Panama or Paraguay or Peru or Philippines or Philipines or Phillipines or Phillippines or "Papua New Guinea" or Romania or Rumania or Roumania or Rwanda or Ruanda or "Saint Lucia" or "St Lucia" or "Saint Vincent" or "St Vincent" or Grenadines or Samoa or "Samoan Islands" or "Navigator Island" or "Navigator Islands" or "Sao Tome" or Senegal or Serbia or Montenegro or Seychelles or "Sierra Leone" or "Sri Lanka" or "Solomon Islands" or Somalia or Sudan or Suriname or Surinam or Swaziland or "South Africa" or Syria or Tajikistan or Tadjhikistan or Tadjikistan or Tadjhik or Tanzania or Thailand or Togo or "Togolese Republic" or Tonga or Tunisia or Turkey or Turkmenistan or Turkmen or Uganda or Ukraine or Uzbekistan or Uzbek or Vanuatu or "New Hebrides" or Venezuela or Vietnam or "Viet Nam" or "West Bank" or Yemen or Zambia or Zimbabwe) not ("African-American\*" or "African American\*" or "Mexican American\*" or "American Indian\*" or "Asian American\*" or "native american\*"));ti,ab,kw 47798

#37 ((developing or "less\* developed" or "under developed" or underdeveloped or "middle income" or "low\* income" or underserved or "under served" or deprived or poor\*) near/1 (countr\* or nation? or population? or world or state\* or economy or economies)) .ti,ab 659  
 #38 (low\* near/1 (gdp or gnp or "gross domestic" or "gross national")):ti,ab 40  
 #39 (low near/3 middle near/3 countr\*):ti,ab 719  
 #40 (lmic or lmics or "third world" or "lami countr\*" or "transitional countr\*"):ti,ab 196  
 #41 {or #34-#40} 55166  
 #42 #9 and #33 and #41 Publication Year from 2000 to 2018 867

### **3. CAB Global Health (Ovid) <1910 to 2018 Week 03> Searched 27th January 2018**

1 exp health care workers/ (60311)  
 2 (((health or medical or healthcare) adj (personnel or worker\* or auxiliar\* or staff or professional\*)) or doctor\* or physician\* or GP or general practitioner? or family doctor or nurse\* or midwi\* or clinical officer\* or pharmacist\* or dentist\* or ((birth or childbirth or labor or labour) adj (attendant? or assistant?))):ti,ab. (113958)  
 3 (lay adj5 (worker? or visitor? or attendant? or aide or aides or support\$ or person\$ or helper? or carer? or caregiver? or care giver? or consultant? or assistant? or staff)):ti,ab. (513)  
 4 (paraprofessional? or paramedic or paramedics or paramedical worker? or paramedical personnel or allied health personnel or allied health worker? or support worker? or home health aide?):ti,ab. (849)  
 5 ((community or village?) adj3 (health worker? or health care worker? or healthcare worker?):ti,ab. (2778)  
 6 (doula? or douladural? or monitrice\* or "barefoot doctor?"):ti,ab. (104)  
 7 primary health care/ or (primary adj (health or care)):ti,ab. (22980)  
 8 or/1-7 (145328)  
 9 (decision\* adj3 (make or makes or making or made or support\* or algorithm\* or aid or aids or app or apps or application\* or tool\* or instrument\* or technolog\* or technique\* or system\* or program\* or process\* or method\* or intervention\* or material\* or board\* or guide\* or counselling\*)):ti,ab. (19367)  
 10 decision making/ or decision support systems/ (5879)  
 11 expert systems/ (101)  
 12 guidelines/ (36483)  
 13 checklists/ or reference works/ (1496)  
 14 information systems/ (3341)  
 15 (((guideline\* or protocol\*) adj4 (adher\* or comply or complian\* or observ\*)) or checklist\*):ti,ab. (8239)  
 16 prescriptions/ (7147)  
 17 errors/ (544)  
 18 pharmacy/ (1449)  
 19 ((prescrib\* or prescription\* or dispens\* or pharmac\*) adj3 (pattern\* or habit\* or behavi\* or practice\* or practis\* or custom\*)):ti,ab. (3658)  
 20 information services/ or information needs/ (1752)  
 21 "diffusion of information"/ (1692)  
 22 knowledge/ or knowledge level/ (20316)  
 23 ((information or knowledge) adj3 (access\* or seek\* or search\* or need\* or request\*)):ti,ab. (8022)  
 24 or/9-23 (102817)  
 25 exp africa/ (228281)  
 26 exp Central America/ or exp Latin America/ or exp South America/ (168913)  
 27 mexico/ (20887)  
 28 exp central asia/ (11750)  
 29 east asia/ or china/ or korea democratic people's republic/ or korea republic/ or mongolia/ (221234)  
 30 exp south asia/ or himalaya/ (140897)  
 31 exp south east asia/ or pacific rim/ (91496)

- 32 exp caribbean/ (21079)  
 33 exp pacific islands/ (13985)  
 34 exp developing countries/ (840339)  
 35 (Africa or Asia or Caribbean or West Indies or South America or Latin America or Central America).tw. (948168)  
 36 (Afghanistan or Albania or Algeria or Angola or Argentina or Armenia or Armenian or Azerbaijan or Bangladesh or Benin or Byelarus or Byelorussian or Belarus or Belorussian or Belorussia or Belize or Bhutan or Bolivia or Bosnia or Herzegovina or Hercegovina or Botswana or Brazil or Bulgaria or Burkina Faso or Burkina Fasso or Upper Volta or Burundi or Urundi or Cambodia or Khmer Republic or Kampuchea or Cameroon or Camerouns or Cameron or Camerons or Cape Verde or Central African Republic or Chad or China or Colombia or Comoros or Comoro Islands or Comores or Mayotte or Congo or Zaire or Costa Rica or Cote d'Ivoire or Ivory Coast or Cuba or Djibouti or French Somaliland or Dominica or Dominican Republic or East Timor or East Timur or Timor Leste or Ecuador or Egypt or United Arab Republic or El Salvador or Eritrea or Ethiopia or Fiji or Gabon or Gabonese Republic or Gambia or Gaza or Georgia Republic or Georgian Republic or Ghana or Grenada or Guatemala or Guinea or Guiana or Guyana or Haiti or Honduras or India or Maldives or Indonesia or Iran or Iraq or Jamaica or Jordan or Kazakhstan or Kazakh or Kenya or Kiribati or Korea or Kosovo or Kyrgyzstan or Kirghizia or Kyrgyz Republic or Kirghiz or Kirgizstan or Lao PDR or Laos or Lebanon or Lesotho or Basutoland or Liberia or Libya or Macedonia or Madagascar or Malagasy Republic or Malaysia or Malaya or Malay or Sabah or Sarawak or Malawi or Mali or Marshall Islands or Mauritania or Mauritius or Agalega Islands or Mexico or Micronesia or Middle East or Moldova or Moldovia or Moldovian or Mongolia or Montenegro or Morocco or Ifni or Mozambique or Myanmar or Myanma or Burma or Namibia or Nepal or Netherlands Antilles or Nicaragua or Niger or Nigeria or Muscat or Pakistan or Palau or Palestine or Panama or Paraguay or Peru or Philippines or Philipines or Phillipines or Phillipines or Papua New Guinea or Romania or Rumania or Roumania or Rwanda or Ruanda or Saint Lucia or St Lucia or Saint Vincent or St Vincent or Grenadines or Samoa or Samoan Islands or Navigator Island or Navigator Islands or Sao Tome or Senegal or Serbia or Montenegro or Seychelles or Sierra Leone or Sri Lanka or Solomon Islands or Somalia or Sudan or Suriname or Surinam or Swaziland or South Africa or Syria or Tajikistan or Tadjikistan or Tadjikistan or Tadjik or Tanzania or Thailand or Togo or Togolese Republic or Tonga or Tunisia or Turkey or Turkmenistan or Turkmen or Uganda or Ukraine or Uzbekistan or Uzbek or Vanuatu or New Hebrides or Venezuela or Vietnam or Viet Nam or West Bank or Yemen or Zambia or Zimbabwe).tw. (926305)  
 37 ((developing or less\* developed or under developed or underdeveloped or middle income or low\* income or underserved or under served or deprived or poor\*) adj (countr\* or nation? or population? or world or state\*)).ti,ab. (46270)  
 38 ((developing or less\* developed or under developed or underdeveloped or middle income or low\* income) adj (economy or economies)).ti,ab. (235)  
 39 (low\* adj (gdp or gnp or gross domestic or gross national)).tw. (64)  
 40 (low adj3 middle adj3 countr\*).tw. (5140)  
 41 (lmic or Imics or third world or lami countr\*).tw. (20036)  
 42 transitional countr\*.tw. (90)  
 43 or/25-41 (1068753)  
 44 8 and 24 and 43 (9736)  
 45 limit 44 to yr="2000 -Current" (8935)

#### **4. Web of Science (SCI, SSCI, AHCI) – Searched 28<sup>th</sup> January 2018**

# 27 **7,657**

#25 AND #12 AND #7

Refined by: PUBLICATION YEARS: ( 2017 OR 2008 OR 2016 OR 2007 OR 2000 OR 2015 OR 2006 OR 2018 OR 2014 OR 2005 OR 2013 OR 2003 OR 2012 OR 2004 OR 2011 OR 2001 OR 2010 OR 2002 OR 2009 )

# 26 8,034

#25 AND #12 AND #7

# 25 9,820,411

#24 OR #23 OR #22 OR #21 OR #20 OR #19 OR #18 OR #17 OR #16

# 24 329

TS=("transitional countr\*")

# 23 11,372

TS=(Imic or Imics or "third world" or "lami countr\*")

# 22 9,314

TS=(low NEAR/3 middle NEAR/3 countr\*)

# 21 418

TS=(low\* NEAR/1 (gdp or gnp or "gross domestic" or "gross national"))

# 20 162,500

TS=((developing or "less\* developed" or "under developed" or underdeveloped or "middle income" or "low\* income" or underserved or "under served" or deprived or poor\*) NEAR/1 (countr\* or nation? or population? or world or state\* or economy or economies))

# 19 273,978

CU=(Africa or Asia or Caribbean or "West Indies" or "Middle East" or "South America" or "Latin America" or "Central America")

# 18 8,740,046

CU=(Afghanistan or Albania or Algeria or Angola or Argentina or Armenia or Armenian or Azerbaijan or Bangladesh or Benin or Byelarus or Byelorussian or Belarus or Belorussian or Belorussia or Belize or Bhutan or Bolivia or Bosnia or Herzegovina or Hercegovina or Botswana or Brazil or Bulgaria or "Burkina Faso" or "Burkina Fasso" or "Upper Volta" or Burundi or Urundi or Cambodia or "Khmer Republic" or Kampuchea or Cameroon or Camerouns or Cameron or Camerons or "Cape Verde" or "Central African Republic" or Chad or China or Colombia or Comoros or "Comoro Islands" or Comores or Mayotte or Congo or Zaire or "Costa Rica" or "Cote d'Ivoire" or "Ivory Coast" or Cuba or Djibouti or "French Somaliland" or Dominica or "Dominican Republic" or "East Timor" or "East Timur" or "Timor Leste" or Ecuador or Egypt or "United Arab Republic" or "El Salvador" or Eritrea or Ethiopia or Fiji or Gabon or "Gabonese Republic" or Gambia or Gaza or "Georgia Republic" or "Georgian Republic" or Ghana or Grenada or Guatemala or Guinea or Guiana or Guyana or Haiti or Honduras or India or Maldives or Indonesia or Iran or Iraq or Jamaica or Jordan or Kazakhstan or Kazakh or Kenya or Kiribati or Korea or Kosovo or Kyrgyzstan or Kirghizia or "Kyrgyz Republic" or Kirghiz or Kirgizstan or "Lao PDR" or Laos or Lebanon or Lesotho or Basutoland or Liberia or Libya or Macedonia or Madagascar or "Malagasy Republic" or Malaysia or Malaya or Malay or Sabah or Sarawak or Malawi or Mali or "Marshall Islands" or Mauritania or Mauritius or "Agalega Islands" or Mexico or Micronesia or "Middle East" or Moldova or Moldovia or Moldovian or Mongolia or Montenegro or Morocco or Ifni or Mozambique or Myanmar or Myanma or Burma or Namibia or Nepal or "Netherlands Antilles" or Nicaragua or Niger or Nigeria or Muscat or Pakistan or Palau or Palestine or Panama or Paraguay or Peru or Philippines or Philipines or Phillipines or Phillipines or "Papua New Guinea" or Romania or Rumania or Roumania or Rwanda or Ruanda or "Saint Lucia" or "St Lucia" or "Saint Vincent" or "St Vincent" or Grenadines or Samoa or "Samoan Islands" or "Navigator Island" or "Navigator Islands" or "Sao Tome" or Senegal or Serbia or Montenegro or Seychelles or "Sierra Leone" or "Sri Lanka" or "Solomon Islands" or Somalia or Sudan or Suriname or Surinam or Swaziland or "South Africa" or Syria or Tajikistan or Tadjhikistan or Tadjikistan or Tadjhik or Tanzania or Thailand or Togo or "Togolese Republic" or Tonga or Tunisia or Turkey or Turkmenistan or Turkmen or Uganda or Ukraine or Uzbekistan or Uzbek or Vanuatu or "New Hebrides" or Venezuela or Vietnam or "Viet Nam" or "West Bank" or Yemen or Zambia or Zimbabwe)

# 17 2,055,819

TS=((Afghanistan or Albania or Algeria or Angola or Argentina or Armenia or Armenian or Azerbaijan or Bangladesh or Benin or Byelarus or Byelorussian or Belarus or Belorussian or Belorussia or Belize or Bhutan or Bolivia or Bosnia or Herzegovina or Hercegovina or Botswana or Brazil or Bulgaria or "Burkina Faso" or "Burkina Fasso" or "Upper Volta" or Burundi or Urundi or Cambodia or "Khmer Republic" or Kampuchea or Cameroon or Camerouns or Cameron or Camerons or "Cape Verde" or "Central African Republic" or Chad or China or Colombia or

Comoros or "Comoro Islands" or Comores or Mayotte or Congo or Zaire or "Costa Rica" or "Cote d'Ivoire" or "Ivory Coast" or Cuba or Djibouti or "French Somaliland" or Dominica or "Dominican Republic" or "East Timor" or "East Timur" or "Timor Leste" or Ecuador or Egypt or "United Arab Republic" or "El Salvador" or Eritrea or Ethiopia or Fiji or Gabon or "Gabonese Republic" or Gambia or Gaza or "Georgia Republic" or "Georgian Republic" or Ghana or Grenada or Guatemala or Guinea or Guiana or Guyana or Haiti or Honduras or India or Maldives or Indonesia or Iran or Iraq or Jamaica or Jordan or Kazakhstan or Kazakh or Kenya or Kiribati or Korea or Kosovo or Kyrgyzstan or Kirghizia or "Kyrgyz Republic" or Kirghiz or Kirgizstan or "Lao PDR" or Laos or Lebanon or Lesotho or Basutoland or Liberia or Libya or Macedonia or Madagascar or "Malagasy Republic" or Malaysia or Malaya or Malay or Sabah or Sarawak or Malawi or Mali or "Marshall Islands" or Mauritania or Mauritius or "Agalega Islands" or Mexico or Micronesia or "Middle East" or Moldova or Moldavia or Moldovan or Mongolia or Montenegro or Morocco or Ifni or Mozambique or Myanmar or Myanma or Burma or Namibia or Nepal or "Netherlands Antilles" or Nicaragua or Niger or Nigeria or Muscat or Pakistan or Palau or Palestine or Panama or Paraguay or Peru or Philippines or Philipines or Phillipines or Phillipines or "Papua New Guinea" or Romania or Rumania or Roumania or Rwanda or Ruanda or "Saint Lucia" or "St Lucia" or "Saint Vincent" or "St Vincent" or Grenadines or Samoa or "Samoan Islands" or "Navigator Island" or "Navigator Islands" or "Sao Tome" or Senegal or Serbia or Montenegro or Seychelles or "Sierra Leone" or "Sri Lanka" or "Solomon Islands" or Somalia or Sudan or Suriname or Surinam or Swaziland or "South Africa" or Syria or Tajikistan or Tadjhikistan or Tadjikistan or Tadjhik or Tanzania or Thailand or Togo or "Togolese Republic" or Tonga or Tunisia or Turkey or Turkmenistan or Turkmen or Uganda or Ukraine or Uzbekistan or Uzbek or Vanuatu or "New Hebrides" or Venezuela or Vietnam or "Viet Nam" or "West Bank" or Yemen or Zambia or Zimbabwe) not ("African-American\*" or "African American\*" or "Mexican American\*" or "American Indian\*" or "Asian American\*" or "native american\*"))

# 16 478,786

TS=(Africa or Asia or Caribbean or "West Indies" or "Middle East" or "South America" or "Latin America" or "Central America")

# 15 3,235,777

#14 OR #13

# 14 2,407,968

TS=(information or knowledge)

# 13 910,516

TS=(prescrib\* or prescription\* or dispens\* or pharmac\*)

# 12 493,150

#11 OR #10 OR #9 OR #8

# 11 83,603

TS=((information or knowledge) NEAR/3 (access\* or seek\* or search\* or need\* or request\*))

# 10 28,489

TS=((prescrib\* or prescription\* or dispens\* or pharmac\*) NEAR/3 (pattern\* or habit\* or behavi\* or practice\* or practise\* or custom\*))

# 9 58,217

TS=(((guideline\* or protocol\*) NEAR/4 (adher\* or comply or complian\* or observ\*)) or checklist\*)

# 8 335,422

TS=(decision\* NEAR/3 (make or makes or making or made or support\* or algorithm\* or aid or aids or app or apps or application\* or tool\* or instrument\* or technolog\* or technique\* or system\* or program\* or process\* or method\* or intervention\* or material\* or board\* or guide\* or counselling or counseling))

# 7 726,237

#6 OR #5 OR #4 OR #3 OR #2 OR #1

# 6 125,194

TS=(primary NEAR/1 (health or care))

# 5 180

TS=(doula? or douladural? or monitrice\* or "barefoot doctor?")

# 4 3,029

TS=((community or village?) NEAR/3 ("health worker?" or "health care worker?" or "healthcare worker?"))  
# 3 5,274

TS=(paraprofessional? or paramedic or paramedics or "paramedical worker?" or "paramedical personnel" or "allied health personnel" or "allied health worker?" or "support worker?" or "home health aide?")  
# 2 3,404

TS=(lay NEAR/5 (worker? or visitor? or attendant? or aide or aides or support\$ or person\$ or helper? or carer? or caregiver? or "care giver?" or consultant? or assistant? or staff))  
# 1 649,011

TS=((health or medical or healthcare) NEAR/1 (personnel or worker\* or auxiliar\* or staff or professional\*)) or doctor\* or physician\* or GP or "general practitioner\*" or "family doctor\*" or nurse\* or midwi\* or "clinical officer\*" or pharmacist\* or dentist\* or ((birth or childbirth or labor or labour) NEAR/1 (attendant\* or assistant\*))

## 5. Embase (Ovid) <1980 to 2018 Week 05> Searched 30<sup>th</sup> January 2018

- 1 exp health care personnel/ (1272742)
- 2 (((health or medical or healthcare) adj (personnel or worker\* or auxiliar\* or staff or professional\*)) or doctor\* or physician\* or GP or general practitioner? or family doctor or nurse\* or midwi\* or clinical officer\* or pharmacist\* or dentist\* or ((birth or childbirth or labor or labour) adj (attendant? or assistant?))).ti,ab,kw. (1097704)
- 3 (lay adj5 (worker? or visitor? or attendant? or aide or aides or support\$ or person\$ or helper? or carer? or caregiver? or care giver? or consultant? or assistant? or staff)).ti,ab,kw. (2359)
- 4 (paraprofessional? or paramedic or paramedics or paramedical worker? or paramedical personnel or allied health personnel or allied health worker? or support worker? or home health aide?).ti,ab,kw. (9617)
- 5 ((community or village?) adj3 (health worker? or health care worker? or healthcare worker?)).ti,ab,kw. (4877)
- 6 (doula? or douladural? or monitrice\* or "barefoot doctor?").ti,ab,kw. (346)
- 7 (primary adj (health or care)).ti,ab,kw. (147185)
- 8 primary health care/ or primary medical care/ (141453)
- 9 or/1-8 (1961429)
- 10 (decision\* adj3 (make or makes or making or made or support\* or algorithm\* or aid or aids or app or apps or application\* or tool\* or instrument\* or technolog\* or technique\* or system\* or program\* or process\* or method\* or intervention\* or material\* or board\* or guide\* or counselling\*)).ti,ab,kw. (221161)
- 11 clinical decision support system/ or clinical decision making/ or decision support system/ or ethical decision making/ or medical decision making/ or decision making/ (316383)
- 12 computer assisted diagnosis/ or computer assisted drug therapy/ (38130)
- 13 expert system/ (5069)
- 14 practice guideline/ (324525)
- 15 clinical protocol/ or protocol compliance/ (91338)
- 16 checklist/ (16841)
- 17 computer assisted therapy/ (4317)
- 18 inappropriate prescribing/ or electronic prescribing/ (5159)
- 19 information system/ or hospital information system/ or medical information system/ or nursing information system/ (71464)
- 20 drug information/ (22078)
- 21 (((guideline\* or protocol\*) adj4 (adher\* or comply or complian\* or observ\*)) or checklist\*).ti,ab,kw. (69034)
- 22 drug utilization/ (18316)
- 23 prescription/ (155034)
- 24 medication error/ or potentially inappropriate medication/ (16779)
- 25 pharmacy/ (67151)

26 clinical practice/ or professional practice/ or medical practice/ (360294)  
 27 ((prescrib\* or prescription\* or dispens\* or pharmac\*) adj3 (pattern\* or habit\* or behavi\* or practice\* or practise\* or custom\*)).ti,ab,kw. (39444)  
 28 access to information/ or digital divide/ (17356)  
 29 information seeking/ or information service/ (17641)  
 30 information literacy/ (399)  
 31 nursing knowledge/ or knowledge/ or professional knowledge/ (45259)  
 32 ((information or knowledge) adj3 (access\* or seek\* or search\* or request\* or availab\* or attitude\*)).ti,ab,kw. (117782)  
 33 or/10-32 (1590896)  
 34 developing country/ (87021)  
 35 low income country/ (1827)  
 36 middle income country/ (2441)  
 37 ((developing or less\* developed or under developed or underdeveloped or middle income or low\* income or underserved or under served or deprived or poor\*) adj (economy or economies)).ti,ab. (618)  
 38 ((developing or less\* developed or under developed or underdeveloped or middle income or low\* income or underserved or under served or deprived or poor\*) adj (countr\* or nation? or population? or world)).ti,ab. (98614)  
 39 (low\* adj (gdp or gnp or gross domestic or gross national)).ti,ab. (302)  
 40 (low adj3 middle adj3 countr\*).ti,ab. (10912)  
 41 (lmic or lmic's or third world or lami countr\*).ti,ab. (6124)  
 42 transitional countr\*.ti,ab. (198)  
 43 global south.ti,ab. (205)  
 44 "Africa south of the Sahara"/ (11730)  
 45 ("africa south of the sahara" or sub-saharan africa or central africa or eastern africa or southern africa or western africa).ti,ab. (25783)  
 46 Botswana/ (2077)  
 47 (Botswana or Bechuanaland or Kalahari).ti,ab. (2177)  
 48 Equatorial Guinea/ (373)  
 49 (Equatorial Guinea or Spanish Guinea).ti,ab. (453)  
 50 Gabon/ (1521)  
 51 (Gabon or Gabonese Republic).ti,ab. (1658)  
 52 Mauritius/ (742)  
 53 (Mauritius or Agalega Islands).ti,ab. (855)  
 54 Namibia/ (1265)  
 55 Namibia.ti,ab. (1290)  
 56 South Africa/ (43279)  
 57 South Africa.ti,ab. (30727)  
 58 Angola/ (1165)  
 59 angola.ti,ab. (1210)  
 60 Cameroon/ (5773)  
 61 Cameroon.ti,ab. (6291)  
 62 Cape Verde/ (260)  
 63 (Cape Verde or Cabo Verde).ti,ab. (487)  
 64 Congo/ (3029)  
 65 (congo not ((democratic republic adj3 congo) or congo red or crimean-congo)).ti,ab. (2135)  
 66 Cote d'Ivoire/ (2848)  
 67 (Cote d'Ivoire or Ivory Coast).ti,ab. (3606)  
 68 Ghana/ (8828)  
 69 (Ghana or Gold Coast).ti,ab. (9057)  
 70 Kenya/ (17113)  
 71 kenya.mp. (20115)  
 72 Lesotho/ (546)  
 73 (Lesotho or Basutoland).ti,ab. (601)  
 74 Mauritania/ (522)

75 Mauritania.ti,ab. (532)  
76 Nigeria/ (32467)  
77 Nigeria.ti,ab. (28722)  
78 "Sao Tome and Principe"/ (59)  
79 (sao tome adj2 principe).ti,ab. (121)  
80 Sudan/ (5392)  
81 (Sudan not south sudan).ti,ab. (6902)  
82 Swaziland/ (753)  
83 Swaziland.ti,ab. (761)  
84 Zambia/ (5056)  
85 (Zambia or Northern Rhodesia).ti,ab. (4614)  
86 Benin/ (1997)  
87 (Benin or Dahomey).ti,ab. (4026)  
88 Burkina Faso/ (3509)  
89 (Burkina Faso or Burkina Fasso or Upper Volta).ti,ab. (4048)  
90 Burundi/ (703)  
91 Burundi.ti,ab. (714)  
92 Central African Republic/ (775)  
93 (Central African Republic or Ubangi-Shari).ti,ab. (905)  
94 Chad/ (789)  
95 Chad.ti,ab. (1068)  
96 Comoros/ (277)  
97 (Comoros or Comoro Islands or Mayotte or Iles Comores).ti,ab. (519)  
98 "Democratic Republic Congo"/ (2858)  
99 ((democratic republic adj2 congo) or belgian congo or zaire).ti,ab. (3631)  
100 Eritrea/ (393)  
101 Eritrea.ti,ab. (462)  
102 Ethiopia/ (11992)  
103 Ethiopia.ti,ab. (10826)  
104 Gambia/ (2460)  
105 Gambia.ti,ab. (2122)  
106 Guinea/ (1513)  
107 (Guinea not (New Guinea or Guinea Pig\* or Guinea Fowl)).ti,ab. (3719)  
108 Guinea-Bissau/ (923)  
109 (Guinea-Bissau or Portuguese Guinea).ti,ab. (957)  
110 Liberia/ (1376)  
111 Liberia.ti,ab. (1312)  
112 Madagascar/ (3695)  
113 (Madagascar or Malagasy Republic).ti,ab. (4234)  
114 Malawi/ (5764)  
115 (Malawi or Nyasaland).ti,ab. (5990)  
116 Mali/ (2858)  
117 Mali.ti,ab. (3462)  
118 Mozambique/ (2857)  
119 (Mozambique or Mocambique or Portuguese East Africa).ti,ab. (3082)  
120 Niger/ (1763)  
121 (Niger not (Aspergillus or Peptococcus or Schizothorax or Cruciferae or Gobius or Lasius or Agelastes or Melanosuchus or radish or Parastromateus or Orius or Apergillus or Parastromateus or Stomoxys)).ti,ab. (3384)  
122 Rwanda/ (2754)  
123 (Rwanda or Ruanda).ti,ab. (2538)  
124 Senegal/ (5939)  
125 senegal.ti,ab. (5531)  
126 Sierra Leone/ (1794)  
127 Sierra Leone.mp. (2313)  
128 exp Somalia/ (1709)

129 Somalia.ti,ab. (1198)  
130 South Sudan/ (135)  
131 south sudan.ti,ab. (429)  
132 Tanzania/ (12272)  
133 (Tanzania or Tanganyika or Zanzibar).ti,ab. (12061)  
134 Togo/ (1158)  
135 (Togo or Togolese Republic).ti,ab. (1319)  
136 Uganda/ (13359)  
137 Uganda.ti,ab. (12650)  
138 Zimbabwe/ (5875)  
139 (Zimbabwe or Rhodesia).ti,ab. (5120)  
140 Maldives/ (208)  
141 Maldives.ti,ab. (240)  
142 Algeria/ (3800)  
143 Algeria.ti,ab. (3601)  
144 Iran/ (39202)  
145 Iran.ti,ab. (39180)  
146 exp Iraq/ (6675)  
147 Iraq.ti,ab. (6749)  
148 Jordan/ (5196)  
149 Jordan.ti,ab. (6156)  
150 Lebanon/ (4495)  
151 Lebanon.ti,ab. (4009)  
152 Libyan Arab Jamahiriya/ (1487)  
153 Libya.ti,ab. (1244)  
154 Argentina/ (18616)  
155 Argentina.ti,ab. (17626)  
156 Belize/ (635)  
157 Belize.ti,ab. (726)  
158 exp Brazil/ (91530)  
159 Brazil.ti,ab. (79390)  
160 Colombia/ (14346)  
161 Colombia.ti,ab. (12170)  
162 Costa Rica/ (4058)  
163 Costa Rica.ti,ab. (4166)  
164 Cuba/ (6155)  
165 Cuba.ti,ab. (4967)  
166 Dominica/ (128)  
167 Dominica.ti,ab. (413)  
168 Dominican Republic/ (2014)  
169 Dominican Republic.ti,ab. (1763)  
170 Ecuador/ (4091)  
171 Ecuador.ti,ab. (3930)  
172 Grenada/ (182)  
173 Grenada.ti,ab. (280)  
174 Guyana/ (675)  
175 Guyana.mp. (1116)  
176 Jamaica/ (3447)  
177 Jamaica.ti,ab. (2950)  
178 Mexico/ (39633)  
179 Mexico.ti,ab. (41246)  
180 exp Panama/ (2426)  
181 Panama.ti,ab. (3163)  
182 Paraguay/ (1154)  
183 Paraguay.mp. (1708)  
184 Peru/ (9426)

185 Peru.ti,ab. (9738)  
186 Saint Lucia/ (83)  
187 (St Lucia or Saint Lucia).ti,ab. (273)  
188 "Saint Vincent and the Grenadines"/ (63)  
189 Grenadines.ti,ab. (62)  
190 Suriname/ (919)  
191 Suriname.ti,ab. (537)  
192 Venezuela/ (5772)  
193 Venezuela.ti,ab. (5348)  
194 Albania/ (1548)  
195 Albania.ti,ab. (1387)  
196 Azerbaijan/ (1566)  
197 Azerbaijan.ti,ab. (1536)  
198 Belarus/ (2567)  
199 (belarus or byelarus or belorussia).ti,ab. (1935)  
200 exp "Bosnia and Herzegovina"/ (2286)  
201 (bosnia or herzegovina).ti,ab. (2430)  
202 Bulgaria/ (8080)  
203 Bulgaria.ti,ab. (5115)  
204 Croatia/ (8714)  
205 croatia.ti,ab. (8186)  
206 Kazakhstan/ (3205)  
207 (Kazakhstan or kazakh).ti,ab. (2994)  
208 "Macedonia (Republic)"/ (974)  
209 Macedonia.ti,ab. (1565)  
210 "Montenegro (republic)"/ (592)  
211 Montenegro.ti,ab. (914)  
212 Romania/ (12433)  
213 Romania.ti,ab. (7339)  
214 exp Russian Federation/ (54940)  
215 USSR/ (44960)  
216 (Russia or Russian Federation or USSR or Union of Soviet Socialist Republics or Soviet Union).mp. (106649)  
217 exp Serbia/ (4687)  
218 serbia.ti,ab. (5401)  
219 "Turkey (republic)"/ (31578)  
220 turkey.ti,ab. not animal/ (34726)  
221 Turkmenistan/ (573)  
222 Turkmenistan.ti,ab. (298)  
223 Yugoslavia/ (8616)  
224 yugoslavia.ti,ab. (2104)  
225 exp Samoan Islands/ (780)  
226 american samoa.ti,ab. (332)  
227 exp China/ (171073)  
228 china.ti,ab. (148036)  
229 Fiji/ (1096)  
230 fiji.ti,ab. (1468)  
231 Malaysia/ (17995)  
232 malaysia.ti,ab. (15868)  
233 Marshall Islands/ (119)  
234 marshall islands.ti,ab. (289)  
235 Nauru/ (54)  
236 nauru.ti,ab. (133)  
237 ("independent state of samoa" or (samoa not american samoa) or western samoa or navigator islands or samoan islands).ti,ab. (463)  
238 Thailand/ (28774)

239 Thailand.ti,ab. (25647)  
240 Tonga/ (318)  
241 tonga.ti,ab. (402)  
242 Tuvalu/ (36)  
243 Tuvalu.ti,ab. (50)  
244 Bangladesh/ (13108)  
245 Bangladesh.ti,ab. (12802)  
246 Bhutan/ (562)  
247 Bhutan.ti,ab. (538)  
248 exp India/ (125083)  
249 India.ti,ab. (103457)  
250 exp Pakistan/ (22188)  
251 Pakistan.ti,ab. (18529)  
252 Sri Lanka/ (6898)  
253 Sri Lanka.ti,ab. (6028)  
254 Djibouti/ (273)  
255 (Djibouti or French Somaliland).ti,ab. (342)  
256 Egypt/ (17504)  
257 Egypt.ti,ab. (14584)  
258 Jordan/ (5196)  
259 Jordan.ti,ab. (6156)  
260 Morocco/ (6276)  
261 Morocco.ti,ab. (5661)  
262 Syrian Arab Republic/ (1978)  
263 (Syria or Syrian Arab Republic).ti,ab. (1703)  
264 Tunisia/ (8499)  
265 tunisia.mp. (10159)  
266 Palestine/ (1219)  
267 Gaza.ti,ab. (926)  
268 Yemen/ (1625)  
269 Yemen.ti,ab. (1642)  
270 Bolivia/ (2998)  
271 Bolivia.ti,ab. (3027)  
272 El Salvador/ (1478)  
273 El Salvador.ti,ab. (1175)  
274 Guatemala/ (3491)  
275 Guatemala.ti,ab. (3223)  
276 Honduras/ (1513)  
277 Honduras.ti,ab. (1573)  
278 Nicaragua/ (1886)  
279 Nicaragua.ti,ab. (1844)  
280 Armenia/ (1705)  
281 Armenia.ti,ab. (1226)  
282 "Georgia (Republic)"/ (1687)  
283 Kosovo/ (315)  
284 Kosovo.ti,ab. (1008)  
285 Kyrgyzstan/ (1410)  
286 (kyrgyzstan or kyrgyz republic or kirghizia or kirghiz).ti,ab. (976)  
287 Moldova/ (990)  
288 Moldova.ti,ab. (716)  
289 Tajikistan/ (821)  
290 tajikistan.ti,ab. (534)  
291 exp Ukraine/ (15321)  
292 Ukraine.ti,ab. (5276)  
293 Uzbekistan/ (1984)  
294 Uzbekistan.ti,ab. (1195)

295 Cambodia/ (4077)  
 296 cambodia.ti,ab. (3639)  
 297 exp Indonesia/ (13216)  
 298 indonesia.ti,ab. (11731)  
 299 Kiribati/ (80)  
 300 Kiribati.ti,ab. (142)  
 301 Laos/ (1812)  
 302 (laos or (lao adj1 democratic republic)).ti,ab. (1571)  
 303 "Marshall Islands"/ (119)  
 304 "Federated States of Micronesia"/ (856)  
 305 (marshall island\* or caroline island\* or ellice island\* or gilbert island\* or johnston island\* or mariana island\* or micronesia or pacific island\*).ti,ab. (6678)  
 306 Mongolia/ (2631)  
 307 mongolia.ti,ab. (3632)  
 308 Myanmar/ (2680)  
 309 (myanmar or burma).ti,ab. (3127)  
 310 Papua New Guinea/ (5341)  
 311 Papua New Guinea.ti,ab. (4157)  
 312 Philippines/ (9527)  
 313 Philippines.ti,ab. (7507)  
 314 Timor-Leste/ (415)  
 315 Timor-Leste.ti,ab. (267)  
 316 Vanuatu/ (371)  
 317 Vanuatu.ti,ab. (569)  
 318 Viet Nam/ (13230)  
 319 (Viet Nam or vietnam).ti,ab. (13417)  
 320 Afghanistan/ (5026)  
 321 Afghanistan.ti,ab. (5599)  
 322 Nepal/ (9183)  
 323 Nepal.ti,ab. (8719)  
 324 Haiti/ (3456)  
 325 Haiti.ti,ab. (2984)  
 326 "North Korea"/ (427)  
 327 (north korea or (democratic people\* republic adj2 korea)).ti,ab. (341)  
 328 or/34-327 [ALL LMICs] (1414607)  
 329 9 and 33 and 328 (34122)  
 330 limit 329 to yr="2000 -Current" (31572)  
 331 limit 330 to embase (19974)

## 6. Poptline – Searched 31<sup>st</sup> January 2018

Title: information OR knowledge OR misinform\* OR Keyword: x INFORMATION OR x INFORMATION CENTERS OR x INFORMATION NETWORKS OR x INFORMATION RETRIEVAL SYSTEMS OR x INFORMATION DISSEMINATION OR x INFORMATION SOURCES OR x INFORMATION SERVICES OR x MISINFORMATION OR x INFORMATION COMMUNICATION TECHNOLOGY OR x KNOWLEDGE SOURCES OR x KNOWLEDGE AND

All Fields: (lay AND (worker\* OR visitor\* OR attendant\* OR aide OR aides OR support\* OR person\* OR helper\* OR carer\* OR caregiver\* OR "care giver\*" OR consultant\* OR assistant\* OR staff)) OR ((community OR village\*) AND ("health worker\*" OR "health care worker\*" OR "healthcare worker\*")) OR "primary health" OR "primary healthcare" OR paraprofessional\* OR paramedic OR paramedics OR "paramedical worker\*" OR "paramedical personnel" OR "allied health personnel" OR "allied health worker\*" OR "support worker\*" OR "home health aide" OR ((birth OR childbirth OR labor OR labour) AND (attendant\* OR assistant\*)) OR doctor\* OR physician\* OR GP OR "general practitioner\*" OR "family doctor" OR nurse\* OR midwi\* OR "clinical officer\*" OR pharmacist\* OR dentist\* OR ((health OR medical OR healthcare) AND (personnel OR worker\* OR auxiliar\* OR staff OR professional\*))

Total – 4536

## 7. WHO Global Health Index – Searched 1<sup>st</sup> February 2018

(tw:(information OR knowledge OR misinform\*)) OR (mh:(information OR knowledge OR misinform\*)) AND (mh:(health personnel)) OR (tw:(doctor\* OR physician\* OR GP OR "general practitioner\*" OR "family doctor" OR nurse\* OR midwi\* OR "clinical officer\*" OR pharmacist\* OR dentist\* OR ((health OR medical OR healthcare) AND (personnel OR worker\* OR auxiliar\* OR staff OR professional\*)) OR (lay AND (worker\* OR visitor\* OR attendant\* OR aide OR aides OR support\* OR person\* OR helper\* OR carer\* OR caregiver\* OR "care giver\*" OR consultant\* OR assistant\* OR staff)) OR ((community OR village\*) AND ("health worker\*" OR "health care worker\*" OR "healthcare worker\*")) OR "primary health" OR "primary healthcare" OR paraprofessional\* OR paramedic OR paramedics OR "paramedical worker\*" OR "paramedical personnel" OR "allied health personnel" OR "allied health worker\*" OR "support worker\*" OR "home health aide" OR ((birth OR childbirth OR labor OR labour) AND (attendant\* OR assistant\*))) AND (year\_cluster:(2000 OR 2001 OR 2002 OR 2003 OR 2004 OR 2005 OR 2006 OR 2007 OR 2008 OR 2009 OR 2010 OR 2011 OR 2012 OR 2013 OR 2014 OR 2015 OR 2016 OR 2017 OR 2018)) - 1521

## 8. Africa-Wide (Ebsco) – Searched 1<sup>st</sup> February 2018

S13 S7 AND S12 - 1,564 Limiters - Year Published: 2000-2018; Data Contributor: AFRICAN HEALTHLINE, .....African Index Medicus, .....African Laboratory for Natural Products Database, .....AIDS Consortium Resource Centre Database, .....Bibliography of Filariasis, .....Community Health Information Database, .....Healthlink Worldwide, .....Healthlit, .....Medicines Information Centre Database, .....SA COUNCIL ON ALCOHOLISM AND DRUG DEPENDENCE DATABASE, .....SAMED, AFRICAN STUDIES, .....Africa Book Centre Database, .....Africa Institute, .....AfricaLit, .....African Books Collective Database, .....African Development Database, .....African Journals Online, .....African Periodicals Exhibit, .....African Publications, .....African Studies Centre Leiden The Netherlands, .....Afrotropical Birds Database, .....CONTEMPORARY AFRICAN POLITICS AND DEVELOPMENT, .....Durban Metropolitan Libraries: Don Africana, .....Ibiscus Database, .....Killie Campbell Africana Library Bibliography, .....Media Africa, .....NAMLIT, .....Natural & Cultural Heritage of Africa, .....NIZA-BIDOC Catalogue, .....Sardius - Bibliographies, .....Sardius - Chronologies, .....Sardius - Treaties, .....School of Oriental & African Studies, .....SOAS: Serials Holdings for Entire Library, .....Swiss Theses on Africa, SOUTH AFRICAN STUDIES, .....Centre for Rural Legal Studies Database, .....Index to South African Periodicals, .....KNIPKAT, .....NELM - Creative Works, .....NELM - Critical Works, .....NELM - Literary Awards, .....NELM - Literature & Literary Criticism by Black South Africans, .....NELM - Main catalog, .....NELM - Manuscripts, .....Nexus - Database of Current & Completed Research in South Africa, .....POLITICAL INFORMATION AND MONITORING SERVICE DATABASE [PIMS], .....South African Legal Abbreviations - Unisa Law Library, .....South African National Bibliography, .....Wits MBA

S12 S8 OR S9 OR S10 OR S11

49,726

S11 TX((information or knowledge) N3 (access\* or seek\* or search\* or need\* or request\*))

11,845

S10 TX(((prescrib\* or prescription\* or dispens\* or pharmac\*) N3 (pattern\* or habit\* or behavi\* or practice\* or practise\* or custom\*)))

2,922

S9 TX(((guideline\* or protocol\*) N4 (adher\* or comply or complian\* or observ\*)) or checklist\*)

10,726

S8 TX((decision\* N3 (make or makes or making or made or support\* or algorithm\* or aid or aids or app or apps or application\* or tool\* or instrument\* or technolog\* or technique\* or system\* or program\* or process\* or method\* or intervention\* or material\* or board\* or guide\* or counselling or counseling)))  
25,313

S7 S1 OR S2 OR S3 OR S4 OR S5 OR S6  
134,610

S6 TX(primary N1 (health or care))  
19,938

S5 TX(doula\* or douladural\* or monitrice\* or "barefoot doctor\*")  
152

S4 TX((community or village\*) N3 ("health worker\*" or "health care worker\*" or "healthcare worker\*"))  
3,007

S3 TX(paraprofessional\* or paramedic or paramedics or "paramedical worker\*" or "paramedical personnel" or "allied health personnel" or "allied health worker\*" or "support worker\*" or "home health aide\*")  
911

S2 TX(lay N5 (worker\* or visitor\* or attendant\* or aide or aides or support\* or person\* or helper\* or carer\* or caregiver\* or "care giver\*" or consultant\* or assistant\* or staff))  
524

S1 TX((((health or medical or healthcare) N1 (personnel or worker\* or auxiliar\* or staff or professional\*)) or doctor\* or physician\* or GP or "general practitioner\*" or "family doctor\*" or nurse\* or midwi\* or "clinical officer\*" or pharmacist\* or dentist\* or ((birth or childbirth or labor or labour) N1 (attendant? or assistant?)))  
120,962

## 9. Library, Information Science & Technology Abstracts (Ebsco) – Searched 1<sup>st</sup> February 2018

S21 S7 AND S12 AND S20 Limiters – Publication Date: 20000101-20181231  
**354 (302 with duplicates removed)**

S20 S13 OR S14 OR S15 OR S16 OR S17 OR S18 OR S19  
108,395

S19 TX("transitional countr\*")  
12

S18 TX(lmic or Imics or "third world" or "lami countr\*")  
1,448

S17 TX(low N3 middle N3 countr\*)  
50

S16 TX(low\* N1 (gdp or gnp or "gross domestic" or "gross national"))  
3

S15 TX((developing or "less\* developed" or "under developed" or underdeveloped or "middle income" or "low\* income" or underserved or "under served" or deprived or poor\*) N1 (countr\* or nation\* or population\* or world or state\* or economy or economies))  
5,475

S14 TX((Afghanistan or Albania or Algeria or Angola or Argentina or Armenia or Armenian or Azerbaijan or Bangladesh or Benin or Byelarus or Byelorussian or Belarus or Belorussian or Belorussia or Belize or Bhutan or Bolivia or Bosnia or Herzegovina or Hercegovina or Botswana or Brazil or Bulgaria or "Burkina Faso" or "Burkina Fasso" or "Upper Volta" or Burundi or Urundi or Cambodia or "Khmer Republic" or Kampuchea or Cameroon or Cameroons or Cameron or Camerons or "Cape Verde" or "Central African Republic" or Chad or China or Colombia or Comoros or "Comoro Islands" or Comores or Mayotte or Congo or Zaire or "Costa Rica" or "Cote d'Ivoire" or "Ivory Coast" or Cuba or Djibouti or "French Somaliland" or Dominica or "Dominican Republic" or "East Timor" or "East Timur" or "Timor Leste" or Ecuador or Egypt or "United Arab

Republic" or "El Salvador" or Eritrea or Ethiopia or Fiji or Gabon or "Gabonese Republic" or Gambia or Gaza or "Georgia Republic" or "Georgian Republic" or Ghana or Grenada or Guatemala or Guinea or Guiana or Guyana or Haiti or Honduras or India or Maldives or Indonesia or Iran or Iraq or Jamaica or Jordan or Kazakhstan or Kazakh or Kenya or Kiribati or Korea or Kosovo or Kyrgyzstan or Kirghizia or "Kyrgyz Republic" or Kirghiz or Kirgizstan or "Lao PDR" or Laos or Lebanon or Lesotho or Basutoland or Liberia or Libya or Macedonia or Madagascar or "Malagasy Republic" or Malaysia or Malaya or Malay or Sabah or Sarawak or Malawi or Mali or "Marshall Islands" or Mauritania or Mauritius or "Agalega Islands" or Mexico or Micronesia or "Middle East" or Moldova or Moldavia or Moldovan or Mongolia or Montenegro or Morocco or Ifni or Mozambique or Myanmar or Myanma or Burma or Namibia or Nepal or "Netherlands Antilles" or Nicaragua or Niger or Nigeria or Muscat or Pakistan or Palau or Palestine or Panama or Paraguay or Peru or Philippines or Philipines or Phillipines or Phillippines or "Papua New Guinea" or Romania or Rumania or Roumania or Rwanda or Ruanda or "Saint Lucia" or "St Lucia" or "Saint Vincent" or "St Vincent" or Grenadines or Samoa or "Samoan Islands" or "Navigator Island" or "Navigator Islands" or "Sao Tome" or Senegal or Serbia or Montenegro or Seychelles or "Sierra Leone" or "Sri Lanka" or "Solomon Islands" or Somalia or Sudan or Suriname or Surinam or Swaziland or "South Africa" or Syria or Tajikistan or Tadjhikistan or Tadjikistan or Tadzhiik or Tanzania or Thailand or Togo or "Togolese Republic" or Tonga or Tunisia or Turkey or Turkmenistan or Turkmen or Uganda or Ukraine or Uzbekistan or Uzbek or Vanuatu or "New Hebrides" or Venezuela or Vietnam or "Viet Nam" or "West Bank" or Yemen or Zambia or Zimbabwe) not ("African-American\*" or "African American\*" or "Mexican American\*" or "American Indian\*" or "Asian American\*" or "native american\*"))

95,492

S13 TX(Africa or Asia or Caribbean or "West Indies" or "Middle East" or "South America" or "Latin America" or "Central America")

23,024

S12 S8 OR S9 OR S10 OR S11

56,286

S11 TX((information or knowledge) N3 (access\* or seek\* or search\* or need\* or request\*))

41,290

S10 TX(((prescrib\* or prescription\* or dispens\* or pharmac\*) N3 (pattern\* or habit\* or behavi\* or practice\* or practise\* or custom\*)))

225

S9 TX(((guideline\* or protocol\*) N4 (adher\* or comply or complian\* or observ\*)) or checklist\*)

3,310

S8 TX((decision\* N3 (make or makes or making or made or support\* or algorithm\* or aid or aids or app or apps or application\* or tool\* or instrument\* or technolog\* or technique\* or system\* or program\* or process\* or method\* or intervention\* or material\* or board\* or guide\* or counselling or counseling)))

13,397

S7 S1 OR S2 OR S3 OR S4 OR S5 OR S6

23,105

S6 TX(primary N1 (health or care))

912

S5 TX(doula\* or douladural\* or monitrice\* or "barefoot doctor\*")

21

S4 TX((community or village\*) N3 ("health worker\*" or "health care worker\*" or "healthcare worker\*"))

28

S3 TX(paraprofessional\* or paramedic or paramedics or "paramedical worker\*" or "paramedical personnel" or "allied health personnel" or "allied health worker\*" or "support worker\*" or "home health aide\*")

1,194

S2 TX(lay N5 (worker\* or visitor\* or attendant\* or aide or aides or support\* or person\* or helper\* or carer\* or caregiver\* or "care giver\*" or consultant\* or assistant\* or staff))

100

S1 TX((((health or medical or healthcare) N1 (personnel or worker\* or auxiliar\* or staff or professional\*)) or doctor\* or physician\* or GP or "general practitioner" or "family doctor\*" or nurse\* or midwi\* or "clinical officer\*" or pharmacist\* or dentist\* or ((birth or childbirth or labor or labour) N1 (attendant? or assistant?)))  
21,453

**10. ClinicalTrials.gov – Searched 3<sup>rd</sup> February 2018**

information OR knowledge OR decision OR decisions OR decision-making | "health personnel" OR doctor OR doctors OR nurse OR nurses OR pharmacist OR pharmacists OR physician OR physicians OR practitioner OR practitioners | Start date on or after 01/01/2000 - **16**

**11. WHO ICTRP – Searched 3<sup>rd</sup> February 2018**

("health personnel" OR doctor OR doctors OR nurse OR nurses OR pharmacist OR pharmacists OR physician OR physicians OR practitioner OR practitioners) AND (information OR knowledge OR decision\*) – **161**
